# Supplementary material for: Coordinate regulation of mutant NPC1 degradation by selective ER autophagy and MARCH6-dependent ERAD
Source: PubMed Central journal article supplement (PMC6131187; doi:10.1038/s41467-018-06115-2), 2018-09-10

Supplementary Information:  
Coordinate regulation of mutant NPC1 degradation by selective ER  
autophagy and MARCH6-dependent ERAD

Schultz et. al.

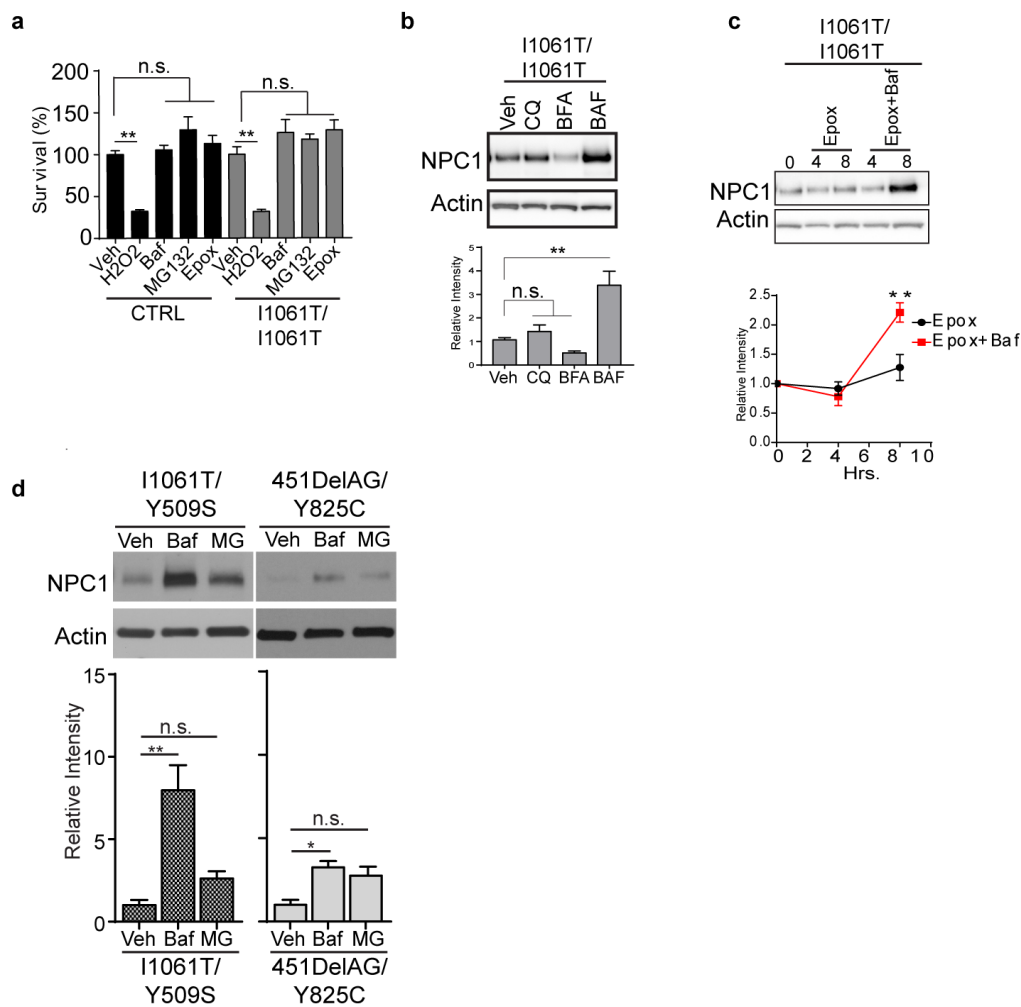

**Supplementary Figure 1. Effects of inhibitors on NPC1 protein levels and cell viability.**

(a) Primary human fibroblasts expressing WT or I1061T NPC1 were treated with vehicle (Veh), 100nM bafilomycin A1 (Baf), 10  $\mu$ M MG132 (MG), 100 nM epoxomicin (Epox), or 1000  $\mu$ M hydrogen peroxide (H<sub>2</sub>O<sub>2</sub>) for 24 hours, and viability was tested using XTT assay.

(b) I1061T fibroblasts were treated for 24 hours with vehicle (Veh), 10  $\mu$ M chloroquine (CQ) or 100 nM bafilomycin A1 (Baf), or for 6 hours with 10  $\mu$ g/ml Brefeldin A (BFA). NPC1 levels were analyzed by western blot. Quantified below.

(c) I1061T fibroblasts were incubated for 0, 4, or 8 hours with 100 nM Epox or with 100 nM Epox + 100 nM Baf. NPC1 protein was analyzed by western blot. Quantified below.

(d) Patient fibroblasts with the indicated *NPC1* mutations were treated for 24 hours with vehicle, 100 nM Baf, or 10  $\mu$ M MG. Quantified below.

(a, b, c, d) Data are mean  $\pm$  s.e.m. from three independent experiments. n.s., not significant, \* $p \leq 0.05$ , \*\* $p \leq 0.01$ , \*\*\* $p \leq 0.001$ , \*\*\*\* $p \leq 0.0001$ . (a, b, c, d) ANOVA with (a, b, c) Tukey and (c) Bonferonni posthoc. a: (n=3, df=9, F=14.89), b: (n=3, df=3, F=26.07), c: (n=3, df=2, F=15.24), d: (n=3, df=2, F=7.76).

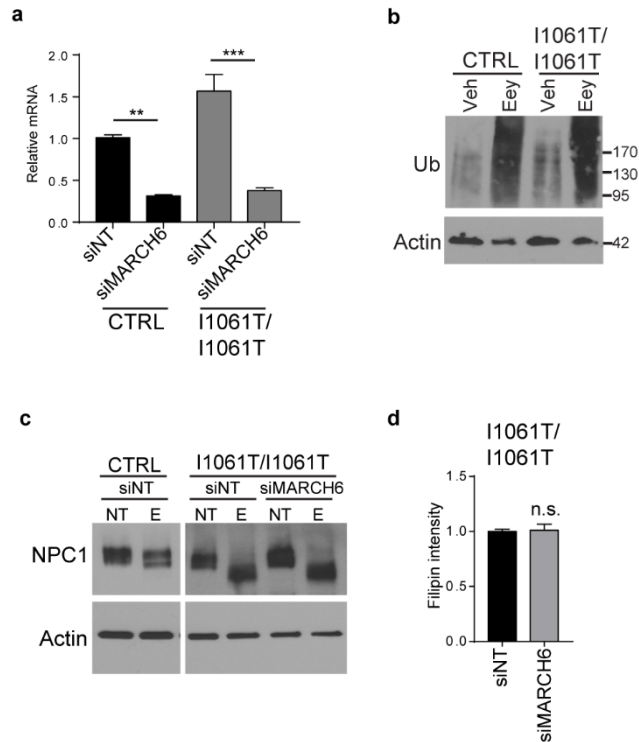

**Supplementary Figure 2. MARCH6 knockdown does not alter I1061T trafficking, and Eeyarestatin I accumulates high molecular weight ubiquitinated species.**

(a, c, d) Primary fibroblasts expressing WT or I1061T NPC1 were treated with non-targeting (NT) or MARCH6 siRNA at t=0 and t=24 hours. MARCH6 mRNA expression (normalized to GAPDH) was analyzed by qPCR. One-Way ANOVA with Tukey post hoc ( $F=33.01$ ,  $df=3$ ,  $n=3$ ),  $**p\leq 0.01$ ,  $***p\leq 0.001$ .

(b) Primary fibroblasts expressing WT or I1061T NPC1 were treated with vehicle (Veh) or 10  $\mu\text{M}$  eeyarestatin I (Eey) for 16 hours, and lysates were analyzed for ubiquitin by western blot.

(c) Lysates were digested with endoglycosidase H (E) or not treated (NT) and then analyzed by western blot.

(d) I1061T cells were stained by filipin. Student's t-test ( $df= 4$ ,  $n=3$ ,  $t=.1868$ ), n.s.= not significant.

Data are mean  $\pm$  s.e.m. from 3 experiments.

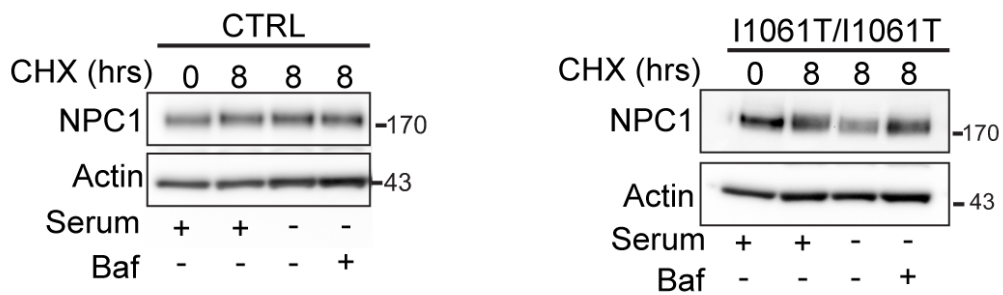

**Supplementary Figure 3. Serum Starvation increases I1061T degradation.**

Primary fibroblasts expressing WT or I1061T NPC1 were treated with 60  $\mu$ g/ml cycloheximide (CHX) for the indicated times in the presence or absence of serum. Treatment with 100 nM Bafilomycin (Baf) during serum starvation recovered I1061T protein levels.

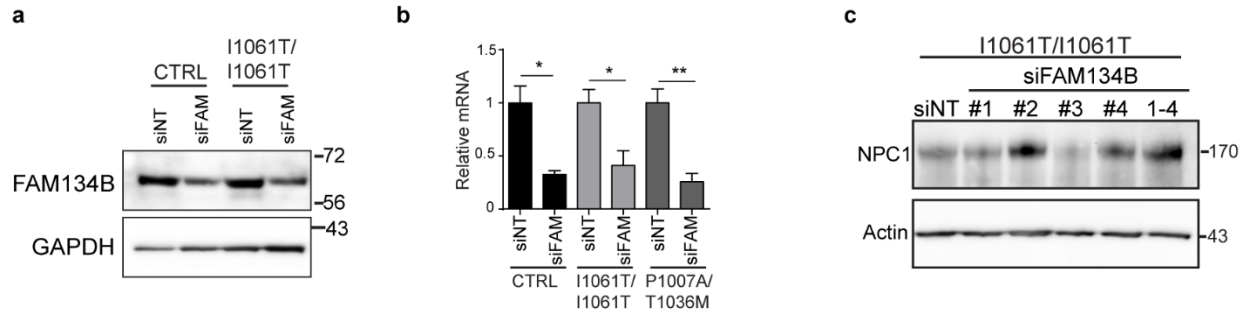

#### Supplementary Figure 4. FAM134B mRNA knockdown by targeted siRNA.

(a, c) CTRL, I1061T, or (b) P1007A/T1036M *NPC1* fibroblasts were treated with non-targeting (NT) or FAM134B (FAM) smartpool siRNAs at t=0 and t=24 hours. FAM134B knockdown was analyzed by (a) western blot or (b) mRNA expression (normalized to GAPDH) by qPCR at t=48 hours. (b) Data are mean  $\pm$  s.e.m. from 3 experiments. One-way ANOVA with Tukey post hoc ( $F=9.6$ ,  $df=5$ ,  $n=3$ ), \* $p \leq 0.05$ , \*\* $p \leq 0.01$ .

(c) To determine which FAM134B siRNAs in the SMARTpool contribute to I1061T accumulation, I1061T fibroblasts were treated as above with individual siRNA from the pool, as follows: #1, #2, #3, #4, or SMARTpool (1-4) containing all four siRNAs. This revealed FAM134B siRNAs #2 and #4 accumulate I1061T protein. NT, non-targeting siRNA.

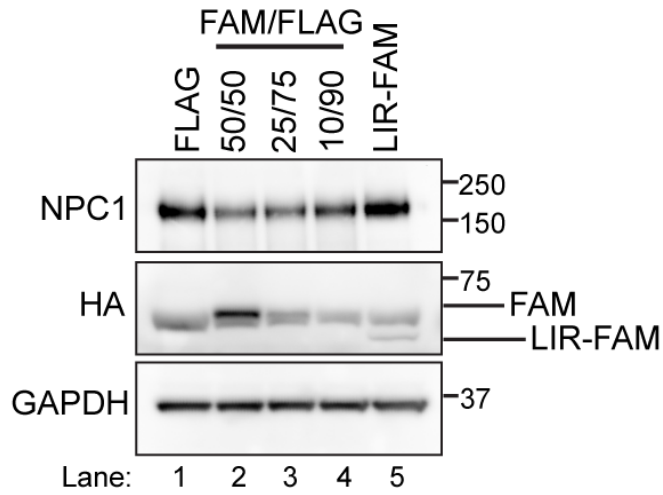

**Supplementary Figure 5: FAM134B lacking LIR domain does not alter I1061T NPC1**

**levels.** To confirm LIR-FAM-HA over-expression does not alter I1061T NPC1 despite expression differences vs. WT-FAM, I1061T/I1061T fibroblasts were transfected with plasmids as follows: 1) 1.5  $\mu\text{g}$  FLAG (control vector), 2) 0.75  $\mu\text{g}$  FLAG + 0.75  $\mu\text{g}$  FAM134B-HA, 3) 1.125  $\mu\text{g}$  FLAG + 0.375  $\mu\text{g}$  FAM134B-HA, 4) 1.35  $\mu\text{g}$  FLAG + 0.15  $\mu\text{g}$  FAM134B-HA, 5) 1.5  $\mu\text{g}$  LIR-FAM134B-HA. Cell lysates were collected 48 hours post-transfection and analyzed by western blot.

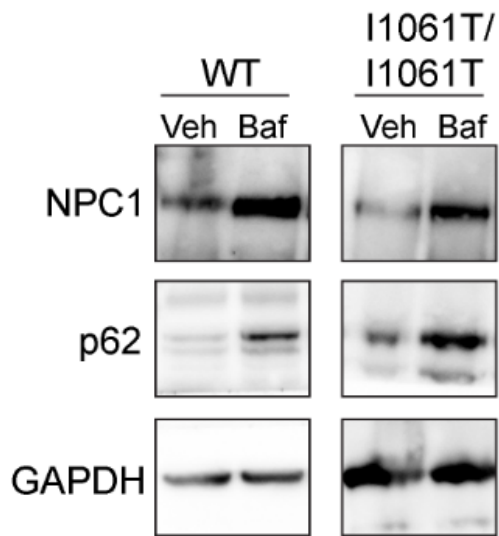

**Supplementary Figure 6. NPC1 protein accumulates in brain slices after treatment with bafilomycin A1.**

Cultured brain slices from 4 week old I1061T/I1061T and WT mice were treated with vehicle (Veh) or 5 mM Baf for 48 hours. Equal amounts of protein lysates were resolved by SDS-PAGE. Membranes were blotted for NPC1, p62, and GAPDH. Baf treatment increased p62 and NPC1 protein levels.



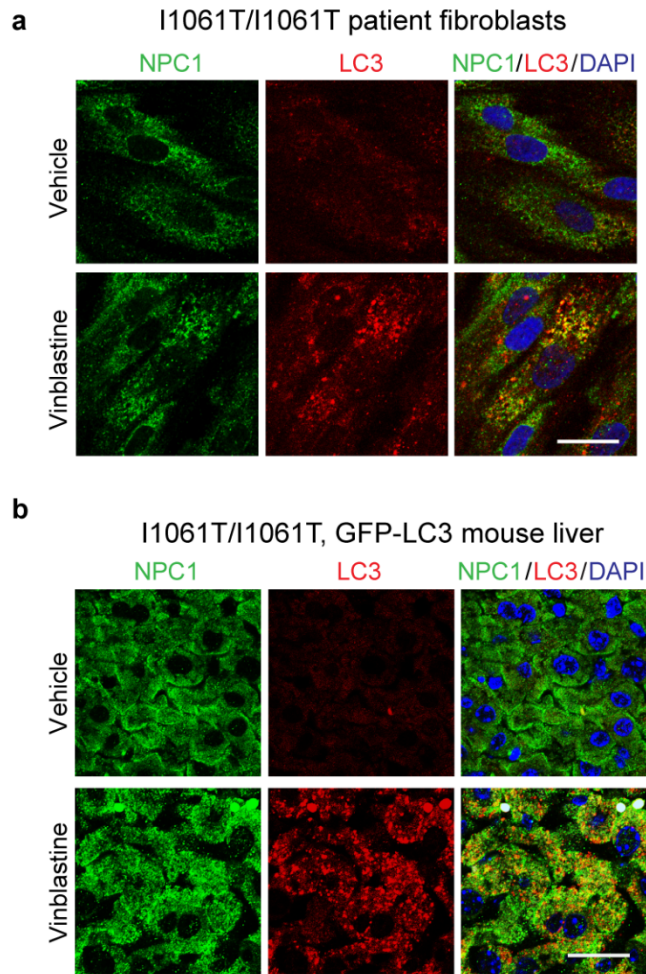

**Supplementary Figure 7. Vinblastine induces I1061T NPC1 and LC3 co-localization.**

(a) I1061T NPC1 human fibroblasts were incubated with vehicle or 50  $\mu$ M vinblastine for two hours.

(b) Seven-week-old I1061T/I1061T-*Npc1*, GFP-LC3 mice were treated with vehicle or vinblastine (.05 mg/g i.p.) for two hours. Liver was harvested for imaging.

NPC1 (green), LC3 (red), and DAPI (blue) were visualized by confocal microscopy. Scale bar=25 $\mu$ M.

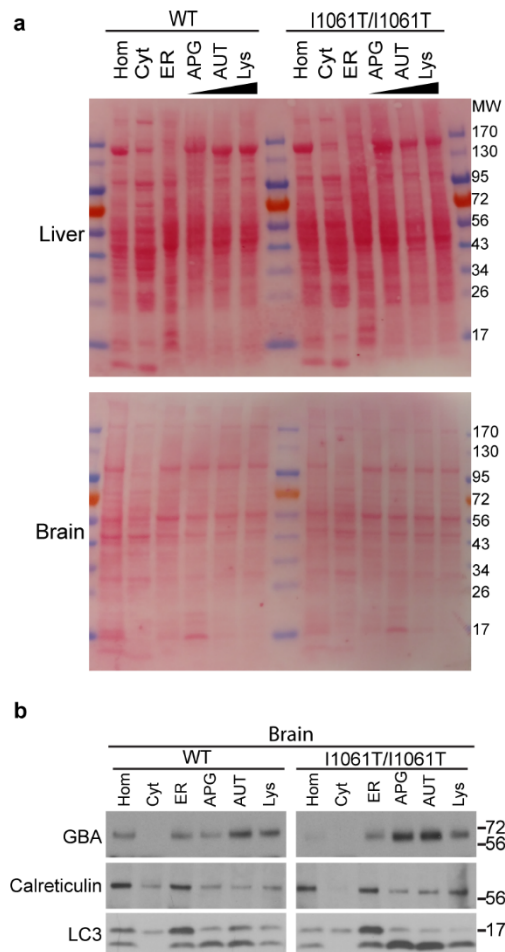

### Supplementary Figure 8. Analysis of mouse liver and brain fractions.

Seven-week-old WT or I1061T/I1061T-*Npc1* mice were treated with vinblastine (.05 mg/g i.p.) for two hours. Fractions from Fig. 7b (liver) and Fig. 8a (brain) were resolved on SDS-PAGE. Whole lysates (Hom) or fractions enriched for cytosol (Cyt), ER, autophagosomes (APG), autophagolysosomes (AUT), or lysosomes (Lys) were transferred and stained by (a) Ponceau S or (b) western blot. (a) Quantification of Ponceau S intensity was measured between the 17 and 170 MW bands. (b) Blots were probed for LC3 (autophagic compartments), calreticulin (ER), or glucocerebrosidase (GBA; lysosomes).

# Supplementary Figure 9. Uncropped Blots

Fig. 1a

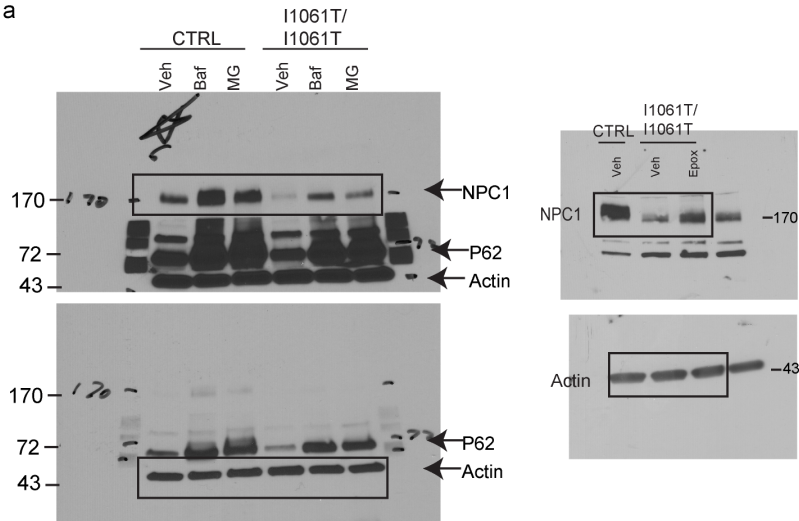

Fig. 1c

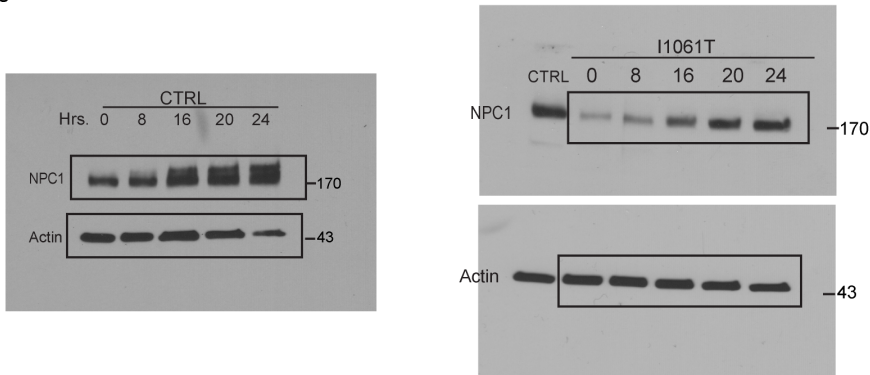

Fig. 1d

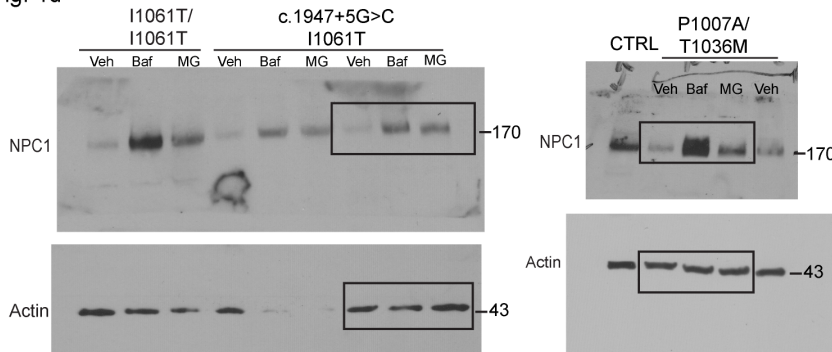

Fig 2a

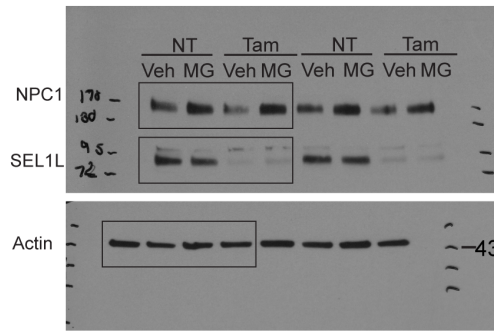

Fig 2b

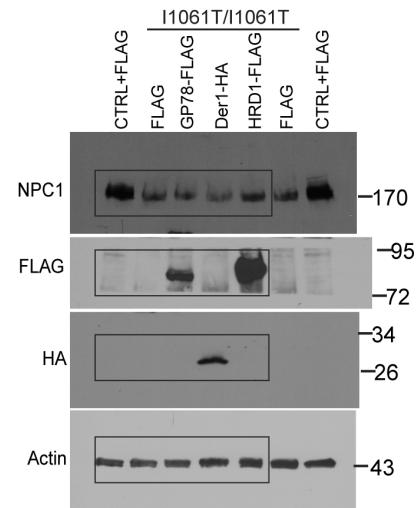

Fig 2c

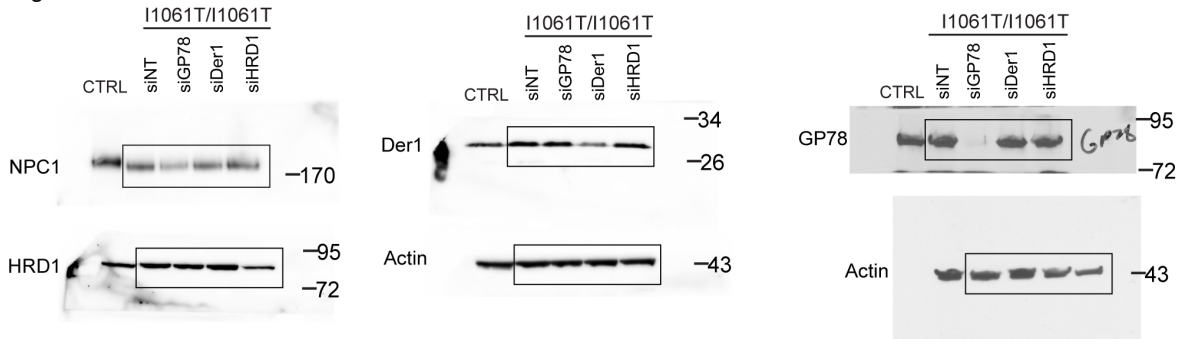

Fig 2d

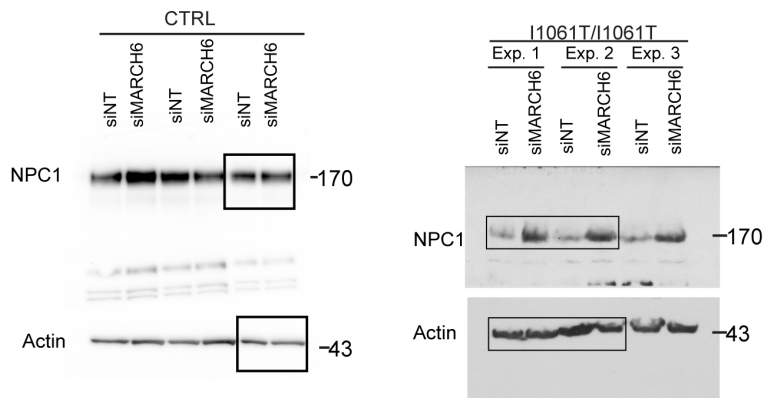

Fig 2e

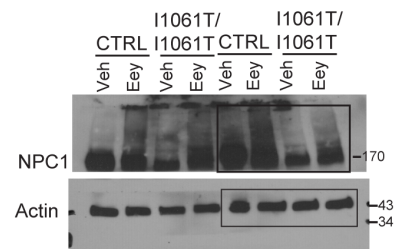

Uncropped Fig. 3b

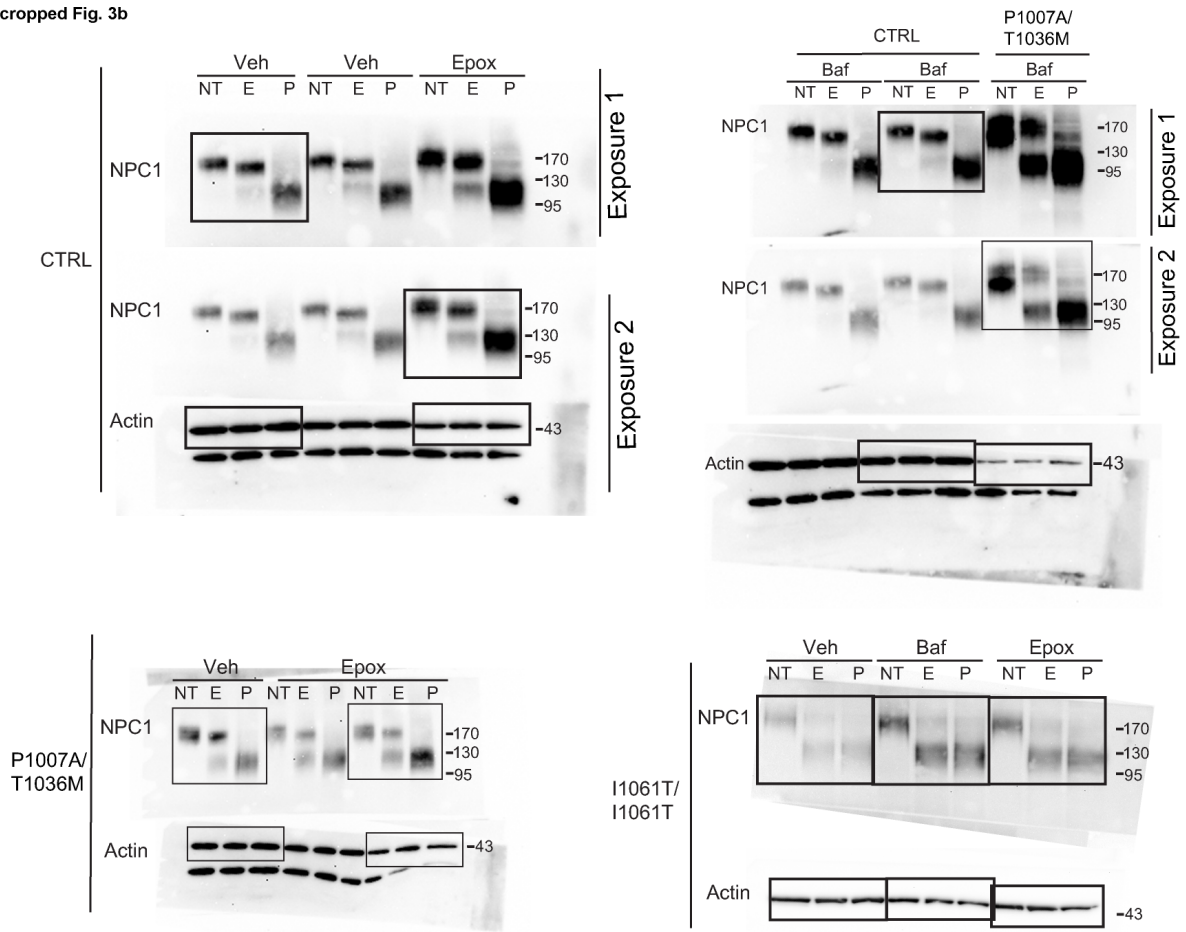

Uncropped Fig. 5a

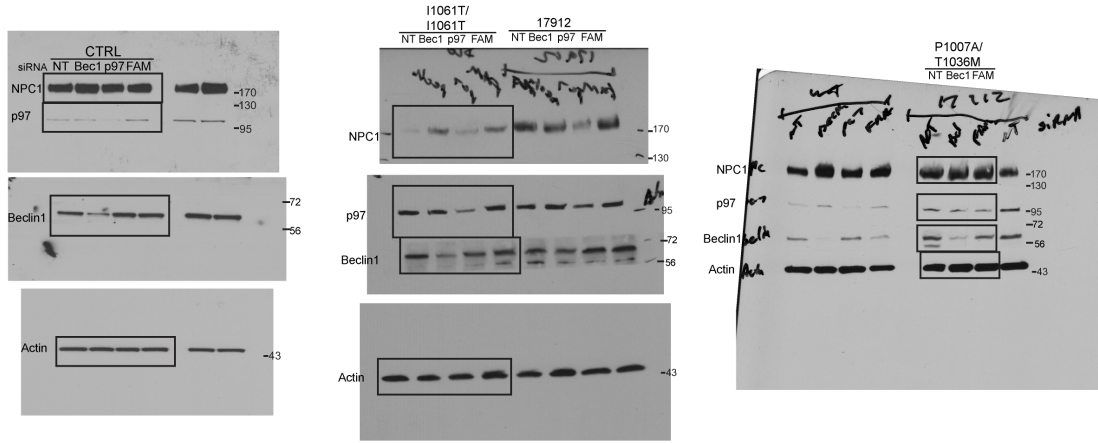

b

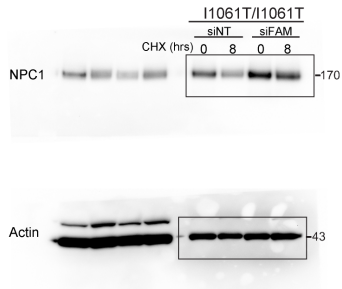

c

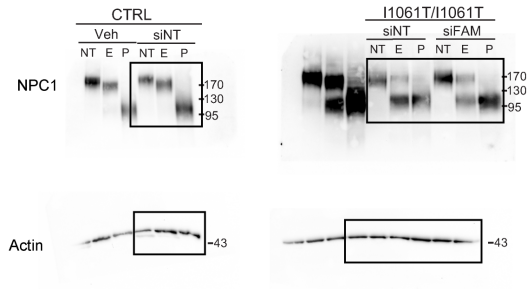

Uncropp Fig. 6a

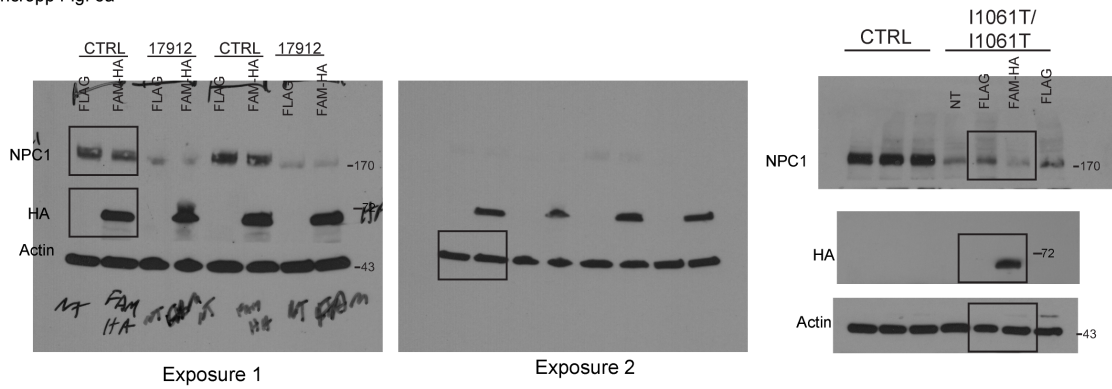

Uncropp Fig. 6c.

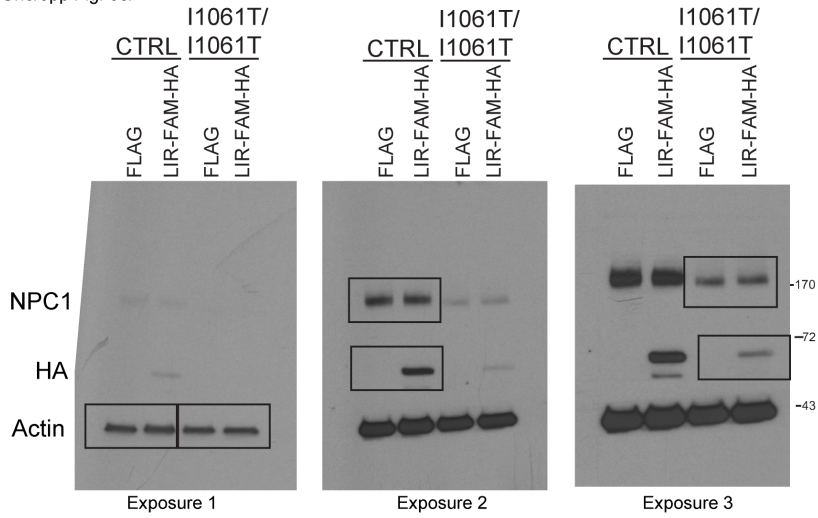

Uncropp Fig. 7b

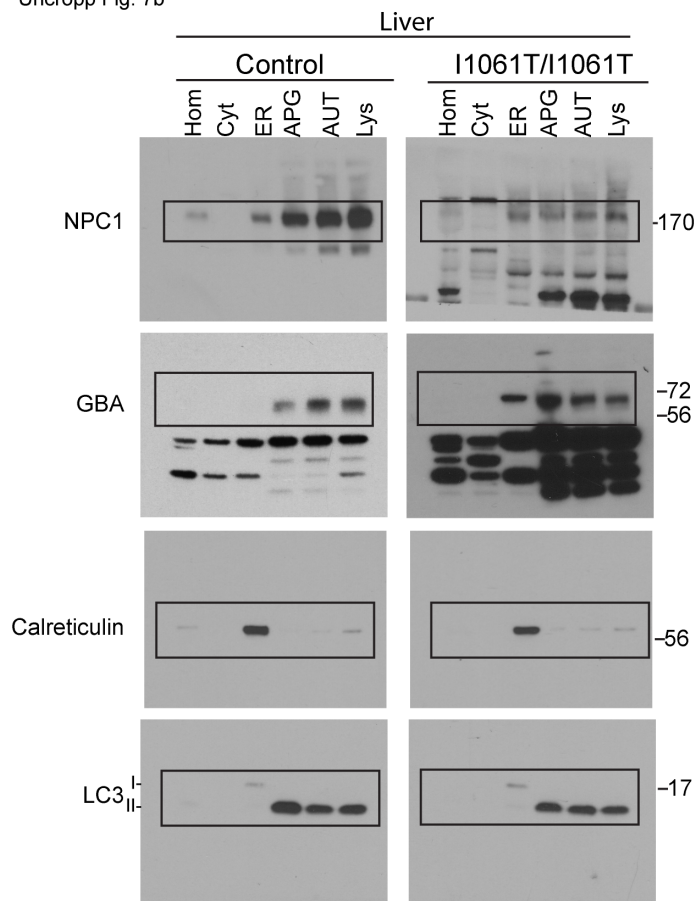



Uncropp Fig. 8a

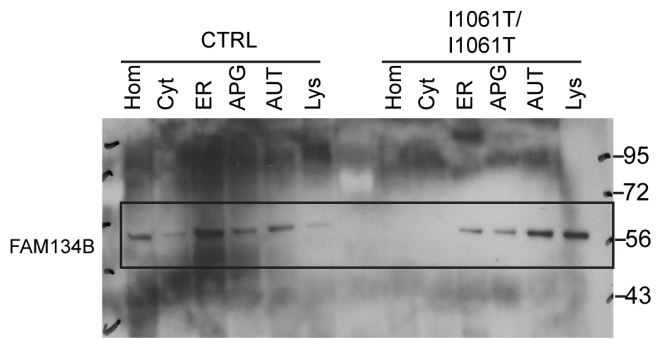

Uncropp Fig. 8c

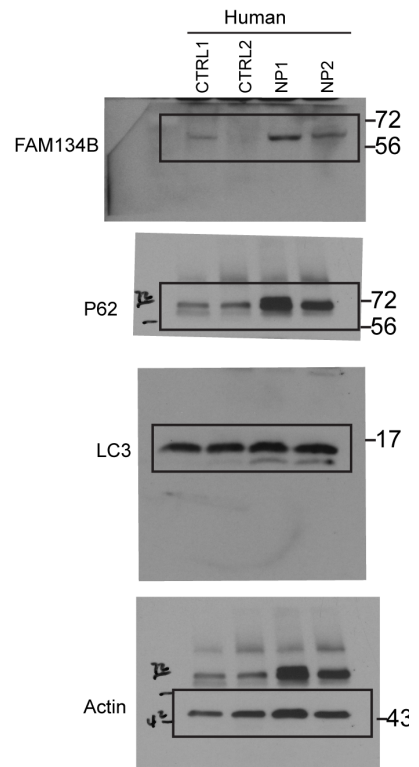

# Supplementary Figure 10. Uncropped Supplements

S1

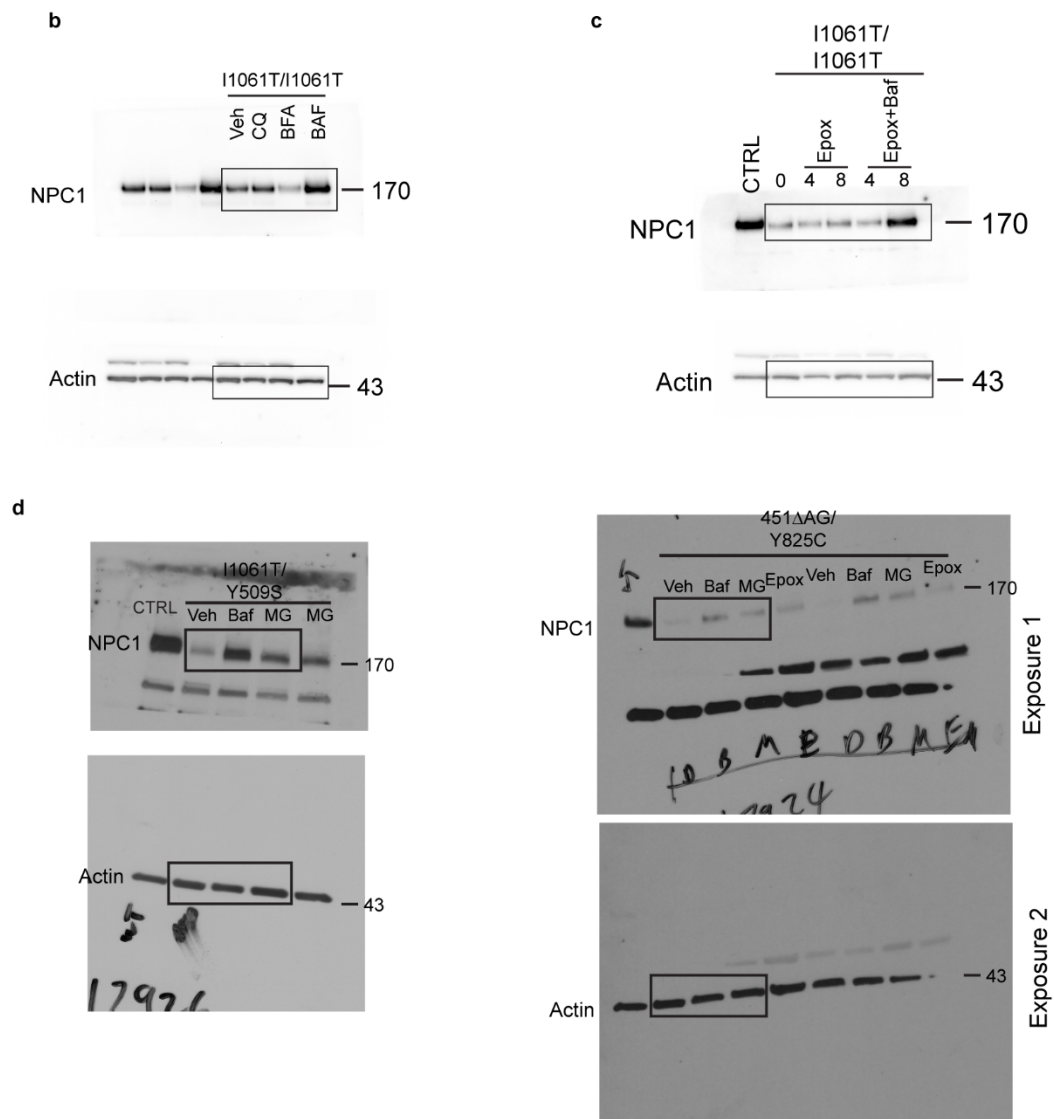

S2

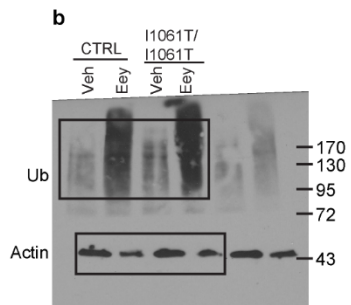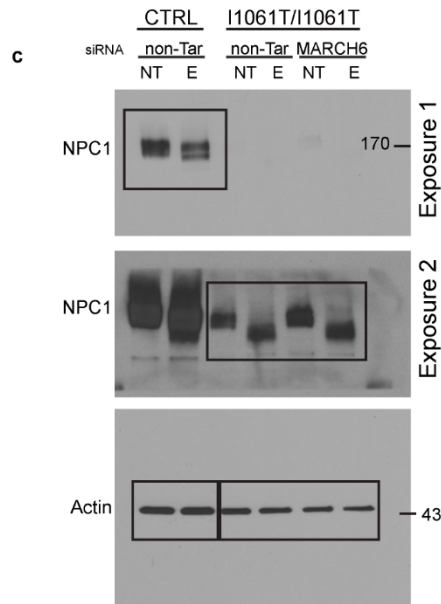

S3

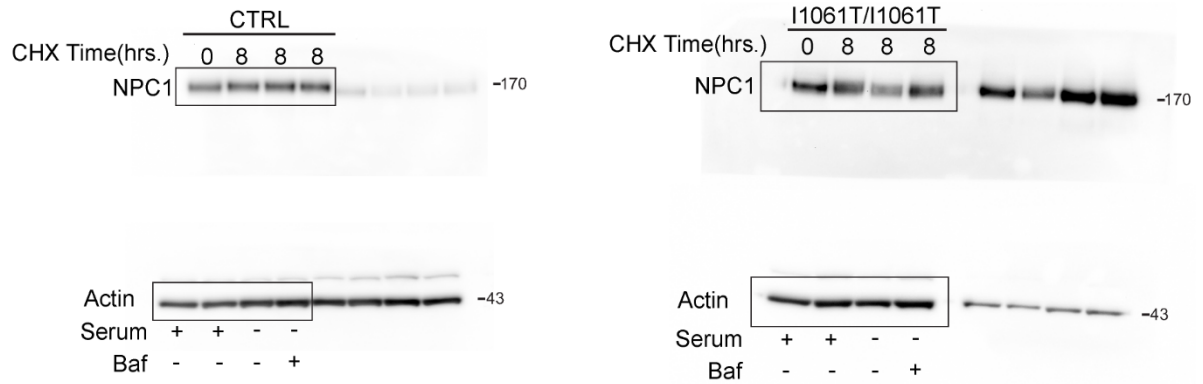

S4

**b**

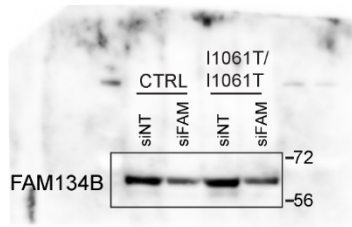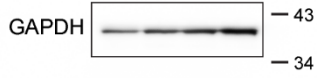

**c**

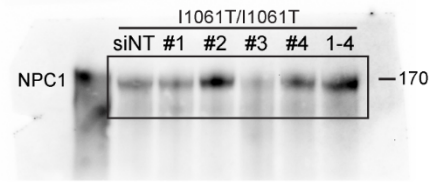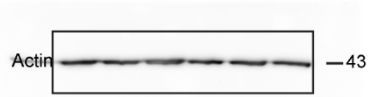

S5

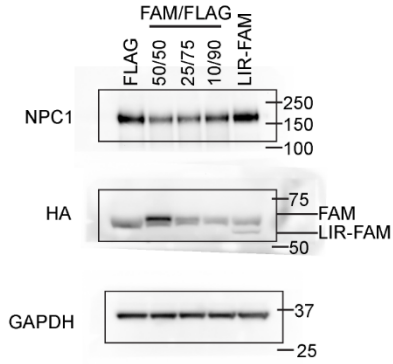

S6

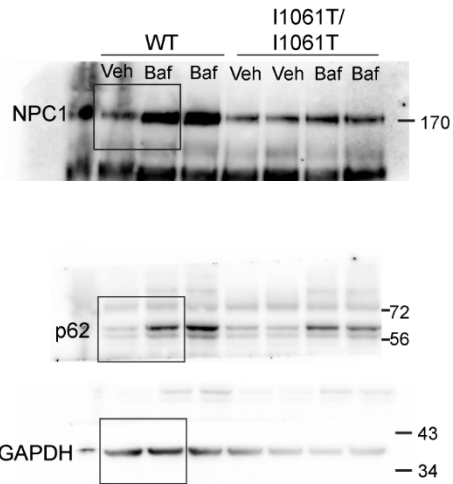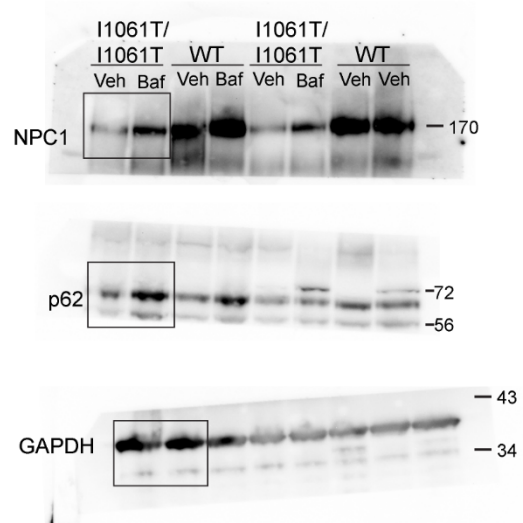

S8

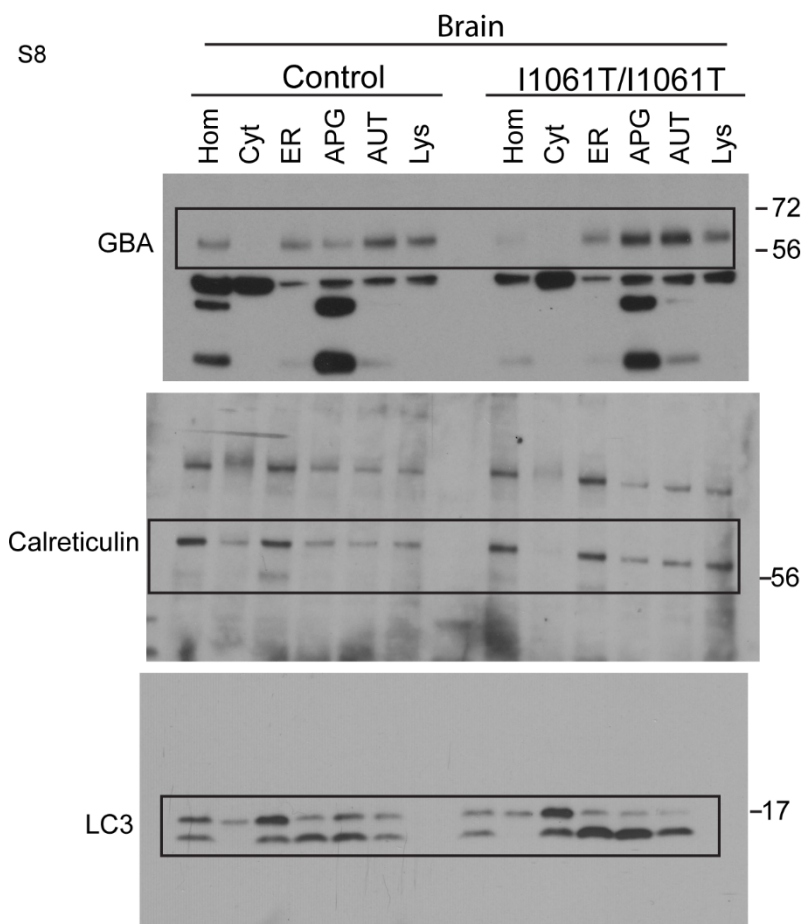

Supplement: 41467_2018_6115_MOESM1_ESM.pdf [file 41467_2018_6115_MOESM1_ESM.pdf]
